# Supplementary material for: Microwave assisted hydrothermal synthesis of Bi2O3 /Ag2O heterostructures with highly enhanced photocatalysis and their biological interest
Source: Research Square preprint supplement (doi:10.21203/rs.3.rs-2125228/v1), 2022-10-10
Supplement: Supplementary file 1 [file 6c835a6ccb323658fc482c90.docx]

**Microwave assisted hydrothermal synthesis of Bi2O3/Ag2O heterostructures with highly enhanced photocatalysis and their biological interest**

Deepu Habbanakuppe Ramakrishnegowda,a Abhilash Mavinakere Ramesh,b* Dhananjay Purushotham, a Anju Kodandaram, b Sudhanva Muddhenahalli Srinivas, c Shobith Rangappa, c Kanchugarakoppal Subbegowda Rangappa, d and Srikantaswamy Shivanna a, b**

*a Centre for Materials Science and Technology, Vijinana Bhavan, University of Mysore, Manasagangotri, Mysore - 570 006, India*

*b Department of Studies in Environmental Science, University of Mysore, Manasagangotri, Mysore - 570 006, India*

*c Adichunchanagiri Institute for Molecular Medicine, Adichunchanagiri University, B. G. Nagara - 571 448, Mandya, India*

*d Institution of Excellence, Vijinana Bhavan, University of Mysore, Manasagangotri, Mysore - 570 006, India*

****Corresponding author e-mail:*** [***appimr250@gmail.com***](mailto:appimr250@gmail.com)**(Abhilash M. R).**

*****Corresponding author e-mail:*** [**srikantaswamy@envsci.uni-mysore.ac.in**](mailto:srikantaswamy@envsci.uni-mysore.ac.in)**(Srikantaswamy S).**

| (hkl) | Peak position 2θ (°) | FWHM(°) | D(nm) |
| --- | --- | --- | --- |
| 200 | 25.84 | 0.462 | 18.44 |
| 120 | 27.54 | 0.479 | 17.84 |
| 012 | 27.66 | 0.483 | 17.61 |
| 220 | 33.18 | 0.499 | 17.36 |
| 210 | 35.18 | 0.509 | 17.11 |
| 130 | 37.74 | 0.525 | 16.71 |
| 220 | 38.92 | 0.538 | 16.37 |
| 013 | 40.16 | 0.546 | 16.19 |
| 222 | 42.52 | 0.555 | 16.05 |
| 132 | 46.44 | 0.566 | 15.96 |
| 104 | 48.72 | 0.579 | 15.74 |
| 321 | 52.52 | 0.588 | 15.75 |
| 014 | 54.94 | 0.597 | 15.68 |
| 331 | 59.28 | 0.609 | 15.69 |
| 225 | 67.04 | 0.629 | 15.83 |
| 325 | 71.52 | 0.636 | 16.09 |
| 420 | 74.56 | 0.636 | 16.41 |

**Electronic supplementary**

**S. Table 1.**The average Bi2O3/Ag2Ocrystallite size.

| S. No | Sample (mg/L) | Photocatalytic degradation (%) | First order Kinetics  (K) min-1 |
| --- | --- | --- | --- |
| 1 | 0.25 | 54.21 | 0.134 |
| 2 | 0.50 | 78.58 | 0.282 |
| 3 | 0.75 | 93.17 | 0.425 |
| 4 | 0.10 | 93.22 | 0.429 |

**S. Table 2.**Photocatalytic degradation of MR dye for different sample concentration.

| Nanocomposite | Removal Efficiency (%) | Viability of Cell lines | Heavy Metal Removal | Reference |
| --- | --- | --- | --- | --- |
| Pt-Ag3PO4/CdS/Chitosan | Methyl blue (MB) - 92 | (HEK-293) and Henrietta Lacks (HeLa) | - | **[1]** |
| FeS2-Bi2O3 | Phenytoin - 97.5 | Henrietta Lacks (HeLa) | **-** | **[2]** |
| Fe2O3/Ag | Methyl blue (MB) - 88.2 | (human lung cancer) [A549 cell](https://www.sciencedirect.com/topics/agricultural-and-biological-sciences/a549-cell) lines | - | **[3]** |
| BiCeO3/MWCNTs | Mordant Red 3 - 95 | B16-F10 | - | **[4]** |
| porous β-Bi2O3 | Methyl blue (MB) - 75 | HEK-293 normal kidney cells | - | **[5]** |
| Ag2O | Caffeine - 99 | HEK-293 normal kidney cells |  | **[6]** |
| Bi2O3/Ag2O | Methyl Red (MR) - 93.22 | Colon cancer cells (HCT116) | Pb | In this Work |

**S. Table 3.** Comparative study on Bi2O3/Ag2O heterostructures and the synthesis of diverse other nanocompositephotocatalyst.

**References**

1. Kiani, M., et al., *Novel Pt-Ag3PO4/CdS/chitosan nanocomposite with enhanced photocatalytic and biological activities.* 2020. **10**(11): p. 2320.

2. Pasha, A.M.K., et al., *Investigation of photocatalytic process for iron disulfide-bismuth oxide nanocomposites by using response surface methodology: structural and antibacterial properties.* 2019. **289**: p. 110950.

3. Saranya, A., et al., *Facile one pot microwave-assisted green synthesis of Fe2O3/Ag nanocomposites by phytoreduction: potential application as sunlight-driven photocatalyst, antibacterial and anticancer agent.* 2020. **207**: p. 111885.

4. Krishnegowda, J., et al., *Hydrothermal processing of interfacial BiCeO3/MWCNTs photocatalyst for rapid dye degradation and its biological interest.* 2021. **9**(4): p. 105774.

5. Jung, H.J., et al., *Fabrication of porous β-Bi2O3 nanoplates by phase transformation of bismuth precursor via low-temperature thermal decomposition process and their enhanced photocatalytic activity.* 2018. **550**: p. 37-45.

6. Muthukumar, H., et al., *Photocatalytic degradation of caffeine and E. coli inactivation using silver oxide nanoparticles obtained by a facile green co-reduction method.* 2022. **24**(4): p. 1087-1098.
